# Supplementary material for: Indoor Environmental Exposures for Children with Asthma Enrolled in the HEAL Study, Post-Katrina New Orleans
Source: PubMed Central journal article supplement (PMC3556612; doi:10.1289/ehp.1104840), 2012-08-15
Supplement: ehp.1104840.s001.pdf [file ehp.1104840.s001.pdf]

## **Supplemental Material**

Indoor Environmental Exposures for Children with Asthma Enrolled in the HEAL Study, Post-Katrina New Orleans

L. Faye Grimsley, Patricia C. Chulada, Suzanne Kennedy, LuAnn White, Jeremy Wildfire, Richard D. Cohn, Herman Mitchell, Eleanor Thornton, Jane El-Dahr, Mosanda M. Mvula, Yvonne Sterling, William J. Martin, Kevin U. Stephens, Maureen Lichtveld

## Contents

|                                                                                                                                                                                                                                                                                                                                                                                                     |   |
|-----------------------------------------------------------------------------------------------------------------------------------------------------------------------------------------------------------------------------------------------------------------------------------------------------------------------------------------------------------------------------------------------------|---|
| Supplemental Material, Figure S1. Baseline home environmental evaluations took place over a 17-month period, from March 2007 through August 2008. The lines (smoothed plot) represent all indoor and outdoor airborne mold levels (spores/m <sup>3</sup> ) measured during the baseline home environmental evaluations. The shaded areas around the lines depict the 95% confidence intervals. .... | 2 |
| Supplemental Material, Table S1: Concentrations of airborne mold in Flooded HEAL homes at baseline (N=68 homes) .....                                                                                                                                                                                                                                                                               | 3 |
| Supplemental Material, Table S2: Concentrations of airborne mold in Non-Flooded HEAL homes at baseline (N=114 homes).....                                                                                                                                                                                                                                                                           | 4 |

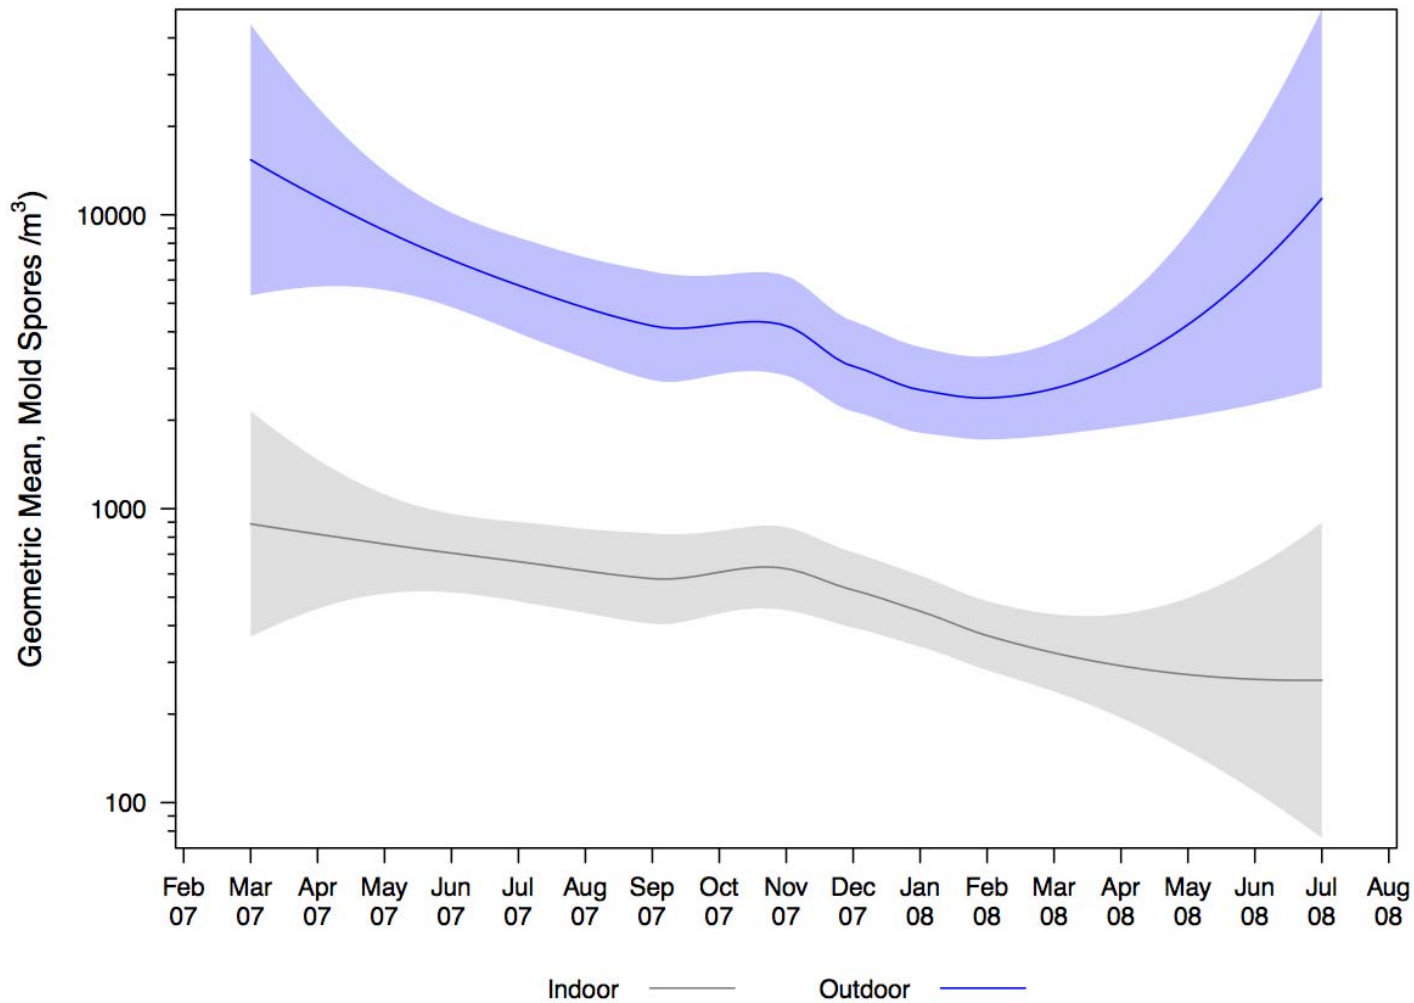

**Supplemental Material, Figure S1.** Baseline home environmental evaluations took place over a 17-month period, from March 2007 through August 2008. The lines (smoothed plot) represent all indoor and outdoor airborne mold levels (spores/ $m^3$ ) measured during the baseline home environmental evaluations. The shaded areas around the lines depict the 95% confidence intervals.

**Supplemental Material, Table S1: Concentrations of airborne mold in Flooded HEAL homes at baseline (N=68 homes)**

| Rank             | Indoor Molds                   |                     |                         | Outdoor Molds                  |                     |                         |
|------------------|--------------------------------|---------------------|-------------------------|--------------------------------|---------------------|-------------------------|
|                  | Mold Type                      | N (%)<br>Detectable | Geometric<br>Mean (GSE) | Mold Type                      | N (%)<br>Detectable | Geometric<br>Mean (GSE) |
| 1 <sup>st</sup>  | Basidiospores                  | 68 (100%)           | 225 (45.0)              | Basidiospores                  | 68 (100%)           | 2055 (483.6)            |
| 2 <sup>nd</sup>  | <i>Cladosporium</i>            | 66 (97%)            | 67 (13.0)               | <i>Cladosporium</i>            | 67 (99%)            | 435 (91.2)              |
| 3 <sup>rd</sup>  | Ascospores                     | 65 (97%)            | 43 (7.4)                | Ascospores                     | 68 (100%)           | 323 (65.8)              |
| 4 <sup>th</sup>  | <i>Penicillium-Aspergillus</i> | 56 (82%)            | 20 (4.5)                | <i>Penicillium-Aspergillus</i> | 53 (78%)            | 22 (5.3)                |
| 5 <sup>th</sup>  | <i>Curvularia</i>              | 55 (81%)            | 14 (2.6)                | <i>Ganoderma</i>               | 52 (76%)            | 18 (4.3)                |
| 6 <sup>th</sup>  | Unidentified                   | 47 (69%)            | 7 (1.1)                 | <i>Curvularia</i>              | 47 (69%)            | 11 (2.7)                |
| 7 <sup>th</sup>  | <i>Bipolaris</i>               | 39 (57%)            | 5 (0.9)                 | <i>Cercospora</i>              | 47 (69%)            | 9 (1.9)                 |
| 8 <sup>th</sup>  | <i>Pithomyces</i>              | 58 (66%)            | 5 (0.8)                 | <i>Alternaria</i>              | 43 (63%)            | 7 (1.5)                 |
| 9 <sup>th</sup>  | <i>Alternaria</i>              | 29 (43%)            | 3 (0.5)                 | Unidentified                   | 42 (63%)            | 7 (1.7)                 |
| 10 <sup>th</sup> | <i>Ganoderma</i>               | 26 (38%)            | 3 (0.4)                 | <i>Bipolaris</i>               | 37 (54%)            | 6 (1.2)                 |
| 11 <sup>th</sup> | <i>Epicoccum</i>               | 19 (28%)            | 2 (0.3)                 | <i>Epicoccum</i>               | 34 (50%)            | 3 (0.6)                 |
| 12 <sup>th</sup> | <i>Chaetomium</i>              | 15 (22%)            | 2 (0.2)                 | <i>Pithomyces</i>              | 28 (41%)            | 3 (0.4)                 |
| 13 <sup>th</sup> | <i>Arthrinium</i>              | 10 (15%)            | 2 (0.2)                 | <i>Pestalotia</i>              | 15 (22%)            | 2 (0.2)                 |
| 14 <sup>th</sup> | <i>Ulocladium</i>              | 11 (16%)            | 1 (0.2)                 | <i>Chaetomium</i>              | 10 (15%)            | 1(0.2)                  |
| 15 <sup>th</sup> | <i>Cercospora</i>              | 10 (15%)            | 1 (0.1)                 | <i>Arthrinium</i>              | 5 (7%)              | 1(0.1)                  |
| 16 <sup>th</sup> | <i>Pestalotia</i>              | 6 (9%)              | 1 (0.1)                 | <i>Stemphylium</i>             | 5 (7%)              | 1(0.1)                  |
| 17 <sup>th</sup> | <i>Stemphylium</i>             | 3 (4%)              | 1 (0.1)                 | <i>Stachybotrys</i>            | 3 (4%)              | 1(0.1)                  |
| 18 <sup>th</sup> | <i>Stachybotrys</i>            | 3 (4%)              | 1 (0.1)                 | <i>Ulocladium</i>              | 2 (3%)              | 1(0.1)                  |
| 19 <sup>th</sup> | <i>Trichoderma</i>             | 0 (0%)              | 0 (0)                   | Rust                           | 2 (3%)              | 1(0.1)                  |
| 20 <sup>th</sup> | Rust                           | 0 (0%)              | 0 (0)                   | <i>Trichoderma</i>             | 1 (1%)              | 1(0.1)                  |
| 21 <sup>st</sup> | Other                          | 0 (0%)              | 0 (0)                   | Other                          | 0 (0%)              | 0 (0)                   |

**Supplemental Material, Table S2: Concentrations of airborne mold in Non-Flooded HEAL homes at baseline (N=114 homes)**

| Rank             | Indoor Molds                   |                     |                         | Outdoor Molds                  |                     |                         |
|------------------|--------------------------------|---------------------|-------------------------|--------------------------------|---------------------|-------------------------|
|                  | Mold Type                      | N (%)<br>Detectable | Geometric<br>Mean (GSE) | Mold Type                      | N (%)<br>Detectable | Geometric<br>Mean (GSE) |
| 1 <sup>st</sup>  | Basidiospores                  | 111 (97%)           | 110 (16.9)              | Basidiospores                  | 113 (99%)           | 1002 (200.1)            |
| 2 <sup>nd</sup>  | <i>Cladosporium</i>            | 110 (96%)           | 63 (9.2)                | <i>Cladosporium</i>            | 113 (99%)           | 510 (80.2)              |
| 3 <sup>rd</sup>  | Ascospores                     | 102 (89%)           | 27 (3.9)                | Ascospores                     | 114 (100%)          | 215 (30.5)              |
| 4 <sup>th</sup>  | <i>Penicillium-Aspergillus</i> | 86 (75%)            | 16 (3.1)                | <i>Penicillium-Aspergillus</i> | 80 (70%)            | 17 (3.4)                |
| 5 <sup>th</sup>  | <i>Curvularia</i>              | 85 (75%)            | 12 (2.1)                | <i>Ganoderma</i>               | 82 (72%)            | 13 (2.3)                |
| 6 <sup>th</sup>  | <i>Bipolaris</i>               | 67 (59%)            | 5 (0.7)                 | <i>Curvularia</i>              | 75 (66%)            | 11 (2.2)                |
| 7 <sup>th</sup>  | Unidentified                   | 64 (56%)            | 5 (0.7)                 | Unidentified                   | 75 (66%)            | 9 (1.6)                 |
| 8 <sup>th</sup>  | <i>Pithomyces</i>              | 62 (54%)            | 5 (0.9)                 | <i>Cercospora</i>              | 47 (59%)            | 6 (1.0)                 |
| 9 <sup>th</sup>  | <i>Alternaria</i>              | 43 (37%)            | 2 (0.3)                 | <i>Alternaria</i>              | 75 (66%)            | 7 (1.0)                 |
| 10 <sup>th</sup> | <i>Ganoderma</i>               | 34 (30%)            | 2 (0.2)                 | <i>Bipolaris</i>               | 71 (62%)            | 5 (0.8)                 |
| 11 <sup>th</sup> | <i>Epicoccum</i>               | 32 (28%)            | 2 (0.2)                 | <i>Epicoccum</i>               | 48 (42%)            | 3 (0.4)                 |
| 12 <sup>th</sup> | <i>Ulocladium</i>              | 21 (18%)            | 2 (0.2)                 | <i>Pithomyces</i>              | 39 (34%)            | 3 (0.4)                 |
| 13 <sup>th</sup> | <i>Pestalotia</i>              | 14 (12%)            | 1 (0.1)                 | <i>Pestalotia</i>              | 27 (24%)            | 2 (0.1)                 |
| 14 <sup>th</sup> | <i>Cercospora</i>              | 13 (11%)            | 1 (0.1)                 | <i>Arthrinium</i>              | 8 (7%)              | 1 (0.1)                 |
| 15 <sup>th</sup> | <i>Chaetomium</i>              | 12 (11%)            | 1 (0.1)                 | <i>Chaetomium</i>              | 7 (6%)              | 1 (0.1)                 |
| 16 <sup>th</sup> | <i>Arthrinium</i>              | 7 (6%)              | 1 (0.1)                 | <i>Ulocladium</i>              | 7 (6%)              | 1 (0.1)                 |
| 17 <sup>th</sup> | <i>Stemphylium</i>             | 5 (4%)              | 1 (0.1)                 | <i>Stachybotrys</i>            | 5 (4%)              | 1 (0.1)                 |
| 18 <sup>th</sup> | <i>Stachybotrys</i>            | 3 (3%)              | 1 (0.04)                | <i>Stemphylium</i>             | 3 (3%)              | 1 (0.04)                |
| 19 <sup>th</sup> | Rust                           | 2 (2%)              | 1 (0.02)                | Rust                           | 3 (3%)              | 1 (0.03)                |
| 20 <sup>th</sup> | <i>Trichoderma</i>             | 1 (1%)              | 1 (0.1)                 | <i>Trichoderma</i>             | 0 (0%)              | 0 (0)                   |
| 21 <sup>st</sup> | Other                          | 0 (0%)              | 0 (0)                   | Other                          | 0 (0%)              | 0 (0)                   |
